# Supplementary material for: Development and systematic evaluation of aqueous triazole chloride-based deep eutectic solvents for efficient CO 2 capture
Source: Royal Society of Chemistry journal article supplement (doi:10.1039/d5gc05611j), 2025-12-12
Supplement: d5gc05611j1.pdf [file d5gc05611j1.pdf]

## Supporting information

### Development and systematic evaluation of aqueous triazole chloride-based deep eutectic solvents for efficient CO<sub>2</sub> capture

Qiangbing Shi<sup>a</sup>, Kaige Jia<sup>a</sup>, Xiangping Zhang<sup>b,c</sup>, Chuan Wang<sup>d</sup>, Paul Cobden<sup>d</sup>, Anna-Maria Beregi Amnéus<sup>e</sup>, David Muren<sup>f</sup>, Xiaoyan Ji<sup>a,\*</sup>

<sup>a</sup>*Energy Engineering, Department of Engineering Science and Mathematics, Luleå University of Technology, Luleå 97187, Sweden*

<sup>b</sup>*Beijing Key Laboratory of Ionic Liquids Clean Process, State Key Laboratory of Mesoscience and Engineering, Institute of Process Engineering, Chinese Academy of Sciences, Beijing 100190, China*

<sup>c</sup>*University of Chinese Academy of Sciences, Beijing 100049, China*

<sup>d</sup>*Swerim AB, Luleå 97125, Sweden*

<sup>e</sup>*SMA Mineral AB, Filipstad 68227, Sweden*

<sup>f</sup>*Linde Gas AB, Luleå 97188, Sweden*

\* Corresponding author.

Email address: [xiaoyan.ji@ltu.se](mailto:xiaoyan.ji@ltu.se)

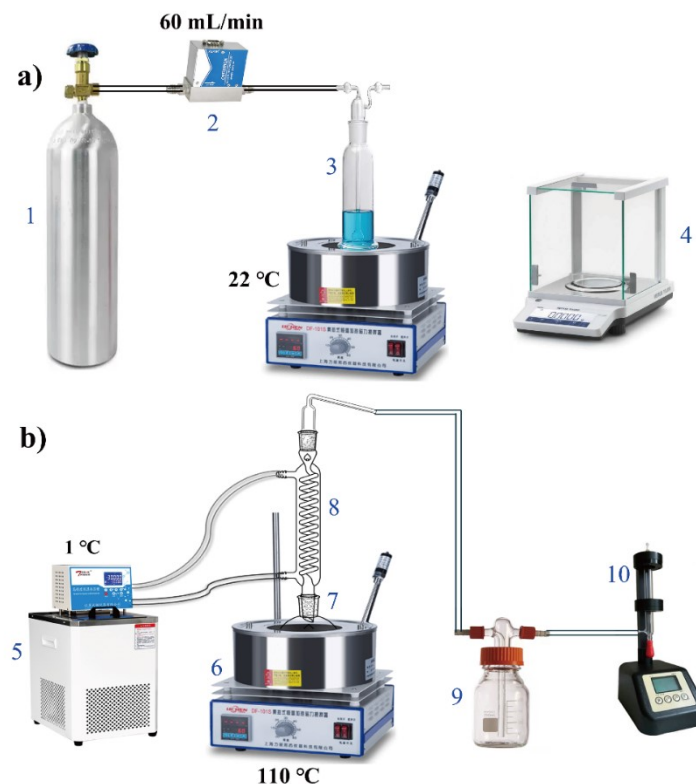

Fig. S1. Schematic diagram of the CO<sub>2</sub> a) absorption and b) desorption apparatus (1 - CO<sub>2</sub>; 2 – mass flow controller; 3 - absorption bottle; 4 - electronic balance; 5 - low-temperature constant temperature bath; 6 - oil bath; 7 - round-bottom flask; 8 - serpentine condenser; 9 - sulfuric acid; 10 - electronic soap film flowmeter).

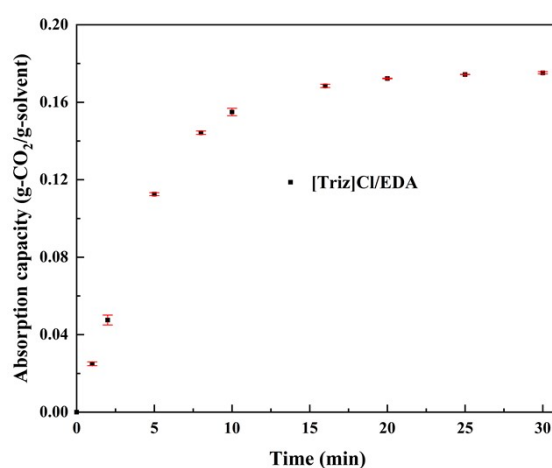

Fig. S2. Experimental results of CO<sub>2</sub> absorption capacity in 30 wt% [TrizCl][EDA] aqueous solutions.

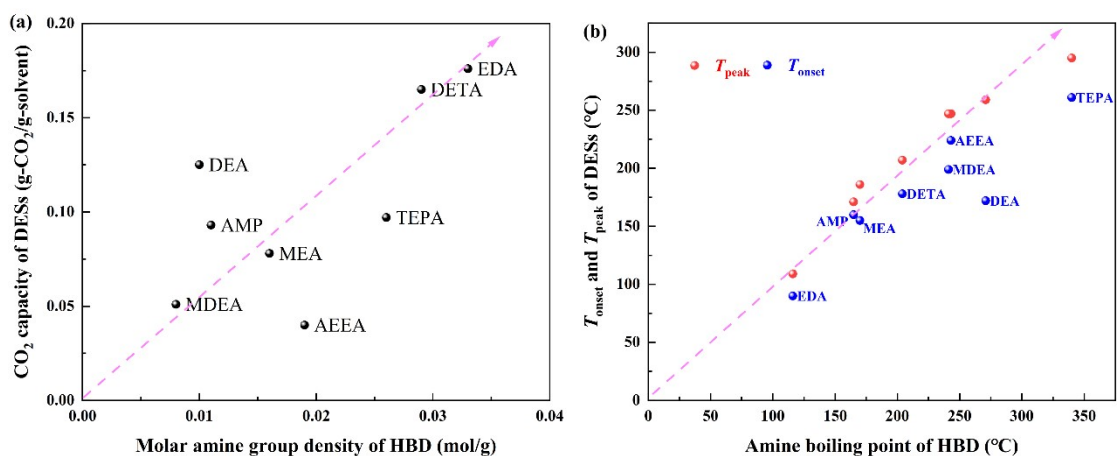

Fig. S3. Structure-property relationships of [TrizCl]/amine.

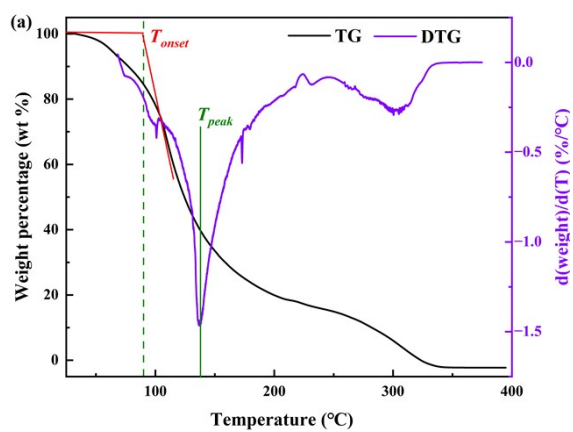

Fig. S4. TG and DTG curves of [TrizCl][EDA].

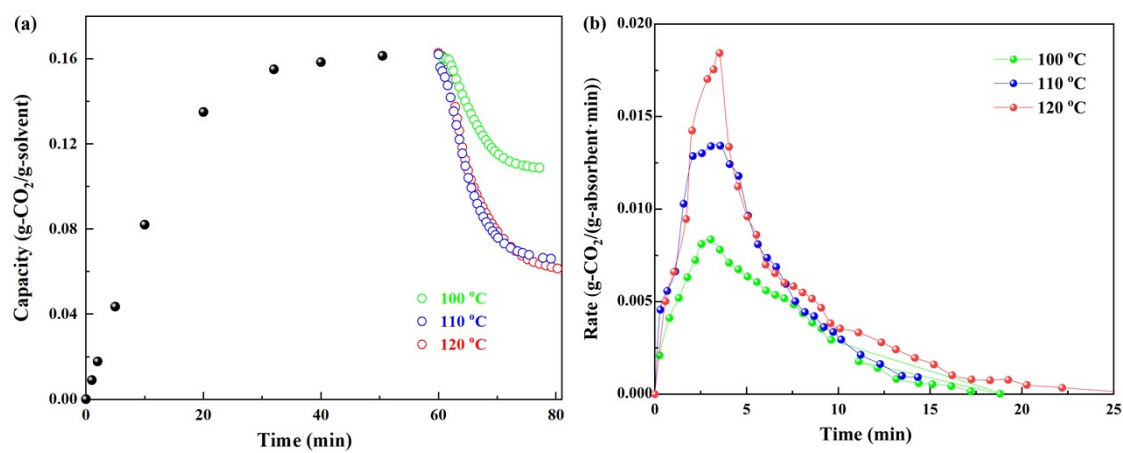

Fig. S5. (a) The variation of CO<sub>2</sub> capacity with time for 30 wt% MEA; and (b) the variation of the CO<sub>2</sub> desorption rate with time at different temperatures.

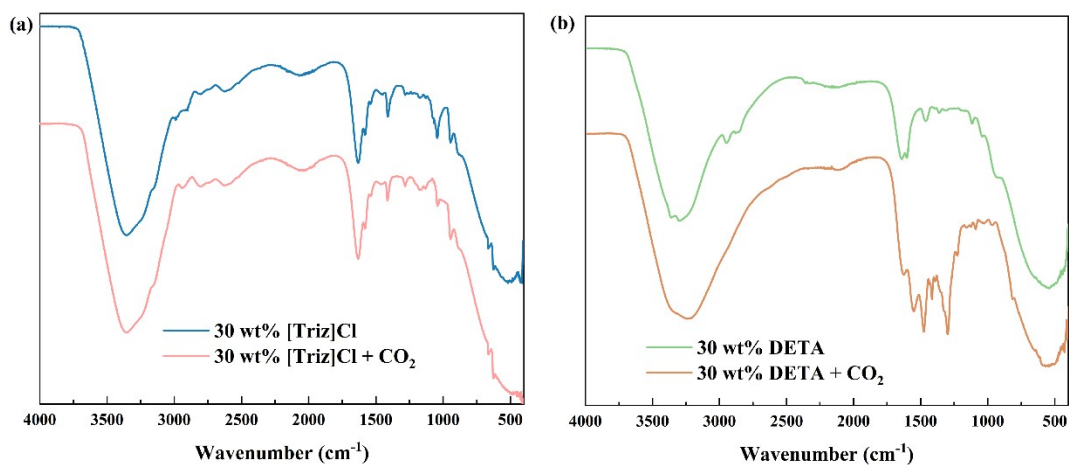

Fig. S6. FTIR of (a) 30 wt% [Triz]Cl and (b) 30 wt% DETA before and after CO<sub>2</sub> absorption.

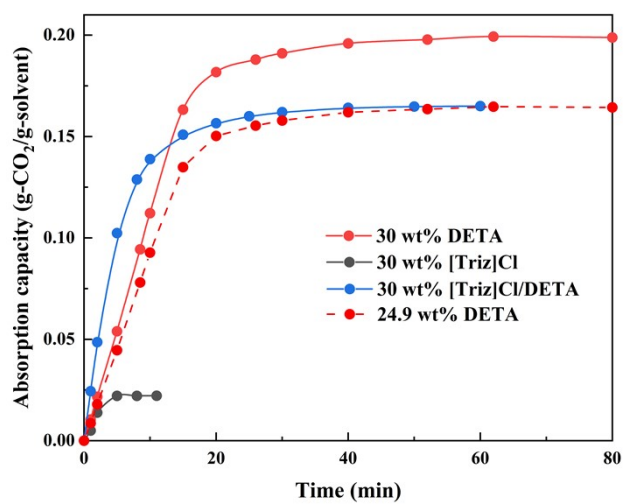

Fig. S7. CO<sub>2</sub> absorption of 30 wt% DETA, [Triz]Cl, [Triz]Cl/DETA, as well as that of 24.9 wt% DETA at 22 °C.

## Section 2: Calculation methods

### 2.1 Normalization: Min-Max scaling methods

$$X' = \frac{X - X_{min}}{X_{max} - X_{min}} \quad (\text{Eq. S1})$$

### 2.2 Calculation procedure for simplified regeneration energy

#### 2.2.1 Assumptions

(1) The regeneration energy is approximated by the sensible heat required to heat the solvent from the absorption temperature  $T_{abs}$  to the desorption temperature  $T_{des}$ .

(2) The 30 wt% aqueous [Triz]Cl/DETA solution is dominated by DETA and water; thus, its heat capacity is approximated by that of aqueous DETA solutions.

(3) The specific heat capacity of 30 wt% aqueous MEA has been reported to be in the range of 3.73-3.90 kJ·kg<sup>-1</sup>·K<sup>-1</sup> (*J. Chem. Eng. Data* 1997, 42, 5, 1004-1006; *Appl. Energ.* 2016, 168, 394-405). 30 wt% aqueous DETA solutions exhibit isobaric heat capacities in the range of 3.7-3.9 kJ·kg<sup>-1</sup>·K<sup>-1</sup>, reported by Lin et al. (*Thermochimica Acta* 2014, 575, 34-39).

#### 2.2.2 Calculation of sensible regeneration energy

For a given solvent, the sensible heat required to raise the temperature from  $T_{abs}$  to  $T_{des}$  is estimated as:

$$Q_{sens} \approx c_p \cdot \Delta T$$

where  $Q_{sens}$  is the sensible heat (kJ·kg<sup>-1</sup>·solvent),  $c_p$  is the specific heat capacity (kJ·kg<sup>-1</sup>·K<sup>-1</sup>), and  $\Delta T = T_{des} - T_{abs}$ .

To compare different solvents,  $Q_{sens}$  is normalised by the cyclic CO<sub>2</sub> loading  $n_c$  (g-CO<sub>2</sub>/g-solvent), yielding an approximate sensible heat requirement per unit CO<sub>2</sub>,  $E_{reg}^{sens}$ :

$$E_{reg}^{sens} \approx \frac{Q_{sens}}{n_c}$$

where  $E_{reg}^{sens}$  is expressed in  $\text{kJ}\cdot\text{kg}^{-1}\cdot\text{CO}_2$ .
